# Supplementary material for: Endothelial Dysfunction in Severe Preeclampsia is Mediated by Soluble Factors, Rather than Extracellular Vesicles
Source: PubMed Central journal article supplement (PMC5517616; doi:10.1038/s41598-017-06178-z), 2017-07-19
Supplement: 41598_2017_6178_MOESM1_ESM.pdf [file 41598_2017_6178_MOESM1_ESM.pdf]

**ENDOTHELIAL DYSFUNCTION IN SEVERE PREECLAMPSIA IS MEDIATED BY SOLUBLE FACTORS, RATHER THAN EXTRACELLULAR VESICLES**

Michelle O'Brien, BSc (1)

Dora Baczyk, MSc (1)

John C. Kingdom MD (1,2,\*)

From the Research Centre for Women's and Infant's Health, Lunenfeld Tanenbaum Research Institute (1) and the Department of Obstetrics & Gynecology, Maternal-Fetal Medicine Division (2), Mount Sinai Hospital, University of Toronto, Ontario, Canada.

# Supplementary Figure 1

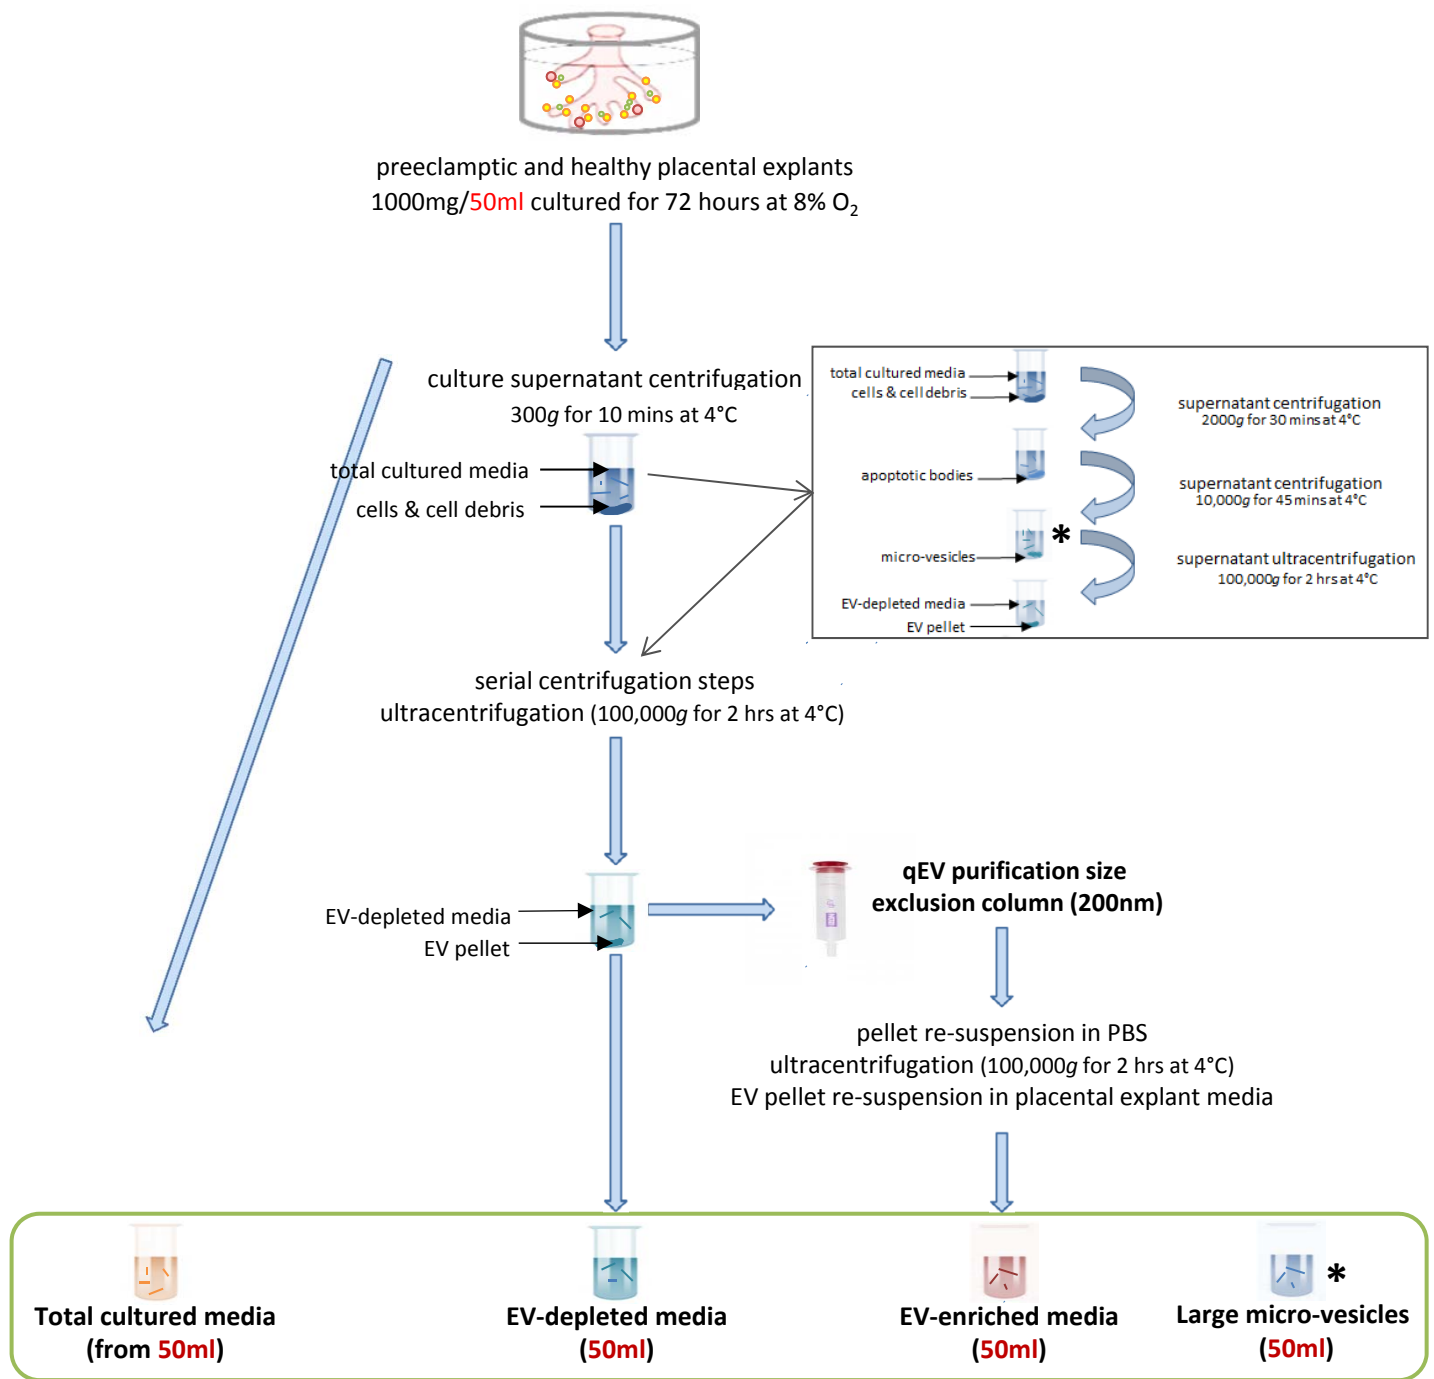



# Supplementary Figure 3

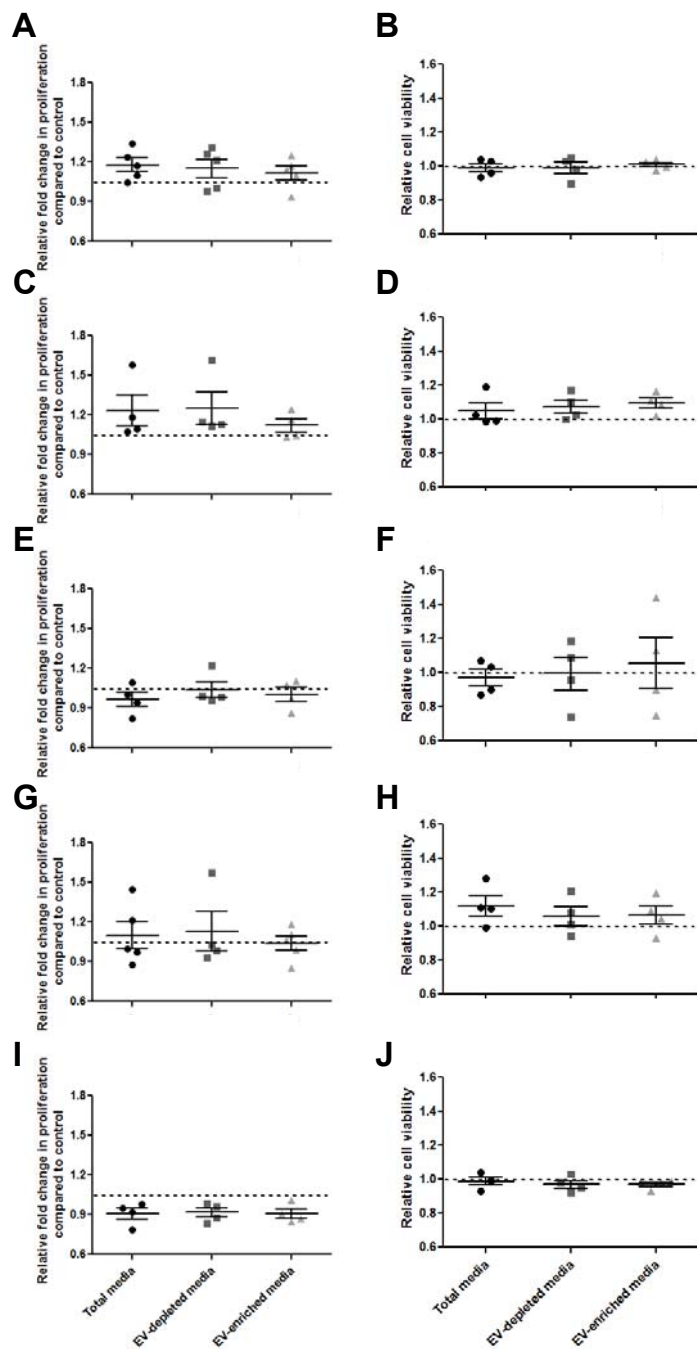

Supplementary Table 1: Patient information

|                                                     |                                | Preterm    | Term       | sPE        | 1 <sup>st</sup> Trimester | 2 <sup>nd</sup> Trimester |
|-----------------------------------------------------|--------------------------------|------------|------------|------------|---------------------------|---------------------------|
|                                                     | <b>Number</b>                  | 4          | 16         | 11         | 14                        | 10                        |
|                                                     | <b>Gestational age (weeks)</b> | 29.0 ± 2.8 | 38.9 ± 0.8 | 29.5 ± 2.1 | 8.76±1.6                  | 18.0±1.8                  |
|                                                     | <b>Maternal Age (years)</b>    | 31.0 ± 2.9 | 34.9 ± 4.1 | 34.6 ± 5.5 |                           |                           |
|                                                     | <b>Gravida</b>                 | 1.8 ± 1.0  | 2.2 ± 1.0  | 2.0 ± 1.8  |                           |                           |
|                                                     | <b>Para</b>                    | 0.3 ± 0.5  | 0.9 ± 0.9  | 0.8 ± 1.5  |                           |                           |
| <b>Delivery Method</b>                              | <b>Vaginal</b>                 | 2          | 0          | 0          |                           |                           |
| <b>Ethnicity</b>                                    | <b>Black</b>                   | 0          | 1          | 1          |                           |                           |
|                                                     | <b>Caucasian</b>               | 3          | 12         | 5          |                           |                           |
|                                                     | <b>Asian</b>                   | 0          | 1          | 1          |                           |                           |
|                                                     | <b>East Indian</b>             | 1          | 2          | 3          |                           |                           |
|                                                     | <b>Middle Eastern</b>          | 0          | 0          | 1          |                           |                           |
|                                                     | <b>N/A</b>                     | 0          | 0          | 0          |                           |                           |
| <b>BP ≥140/90mmHg</b>                               | <b>No</b>                      | 4          | 14         | 0          |                           |                           |
|                                                     | <b>Yes</b>                     | 0          | 0          | 11         |                           |                           |
|                                                     | <b>N/A</b>                     | 0          | 2          | 0          |                           |                           |
| <b>Abnormal Umbilical cord Doppler (AEDV,REDFV)</b> | <b>No</b>                      | 4          | 0          | 3          |                           |                           |
|                                                     | <b>Yes</b>                     | 0          | 0          | 8          |                           |                           |
| <b>Abnormal Umbilical cord Doppler (AREDFV)</b>     | <b>N/A</b>                     | 0          | 15         | 0          |                           |                           |
|                                                     | <b>Male</b>                    | 3          | 5          | 6          |                           |                           |
| <b>Sex</b>                                          | <b>N/A</b>                     | 0          | 15         | 0          |                           |                           |
|                                                     | <b>Female</b>                  | 1          | 11         | 5          |                           |                           |
|                                                     | <b>N/A</b>                     | 0          | 0          | 0          |                           |                           |
|                                                     | <b>Birth weight (g)</b>        | 1348 ± 498 | 3468 ± 562 | 997 ± 291  |                           |                           |
|                                                     | <b>N/A</b>                     | 0          | 0          | 0          |                           |                           |
| <b>Placenta</b>                                     | <b>weight (g)</b>              | 380 ± 124  | N/A        | 256 ± 74   |                           |                           |

N/A=not available

AREDFV=absent/reversed end-diastolic flow velocity

## Supplementary Table 2: Primer sequences

| Primer Name |         | Primer Sequence                 |
|-------------|---------|---------------------------------|
| TBP         | forward | TGC ACA GGA GCC AAG AGT GAA     |
|             | reverse | CAC ATC ACA GC CCC CAC CA       |
| TOPO1       | forward | GAT GAA CCT GAA GAT GAT GGC     |
|             | reverse | TCA GCA TCA TCC TCA TCT CG      |
| YWHAZ       | forward | ACT TTT GGT ACA TTG TGG CTT CAA |
|             | reverse | CCG CCA GGA CAA ACC AGT AT      |
| Endoglin    | forward | CATGCAGATCTGGACCACTG            |
|             | reverse | GCCACAATGCTGGCATTGAG            |
| eNOS        | forward | GAA GCT GCA GGT GTT CGA TG      |
|             | reverse | CCG GTT GGT GGC ATA CTT GA      |
| Endothelin1 | forward | GAA CTC AGG GCT GAA GAC AT      |
|             | reverse | GGT GTT CCT CTG AAC TTC TTC TG  |
| SOD1        | forward | GAC TGA CTG AAG GCC TGC AT      |
|             | reverse | CAC TGG TAC AGC CTG CTG TA      |
| TGFB        | forward | TGC TGC AGG CCT TCG ATG T       |
|             | reverse | GAC TCC CTC TGG CAA TTG C       |
| PIGF        | forward | CAC GTG GGC CCT GCT TGC TG      |
|             | reverse | ACA CTT CTT GGA AGG GTA CCA     |
| sFLT        | forward | TGG ACT GAC AGC AAA CCC AA      |
|             | reverse | CAG AAA CTG GGG CTG CTG AC      |
| HO1         | forward | CCG CTT CAA GCT GGT GAT GCC     |
|             | reverse | CCT GCT CCA GGG CATG CCT TG     |
| HO2         | forward | CGG CTC CAC ACT GGG CAG AG      |
|             | reverse | GCC CTC CAG GGC ACC TTT GTC     |
| ICAM        | forward | GAC CGC AGA GGA CGA GGG CA      |
|             | reverse | TTG GGC GCC GGA AAG CTG TAG     |
| MCP1        | forward | TTC ATT CCC CAA GGG CTC GCT CA  |
|             | reverse | AGC ACA GAT CTC CTT GGC CAC AA  |

**Supplementary Figure 1.** Schematic depiction of serial centrifugation and purification steps employed to fractionate: total, EV-depleted, EV-enriched media and micro-vesicle enriched fractions.

**Supplementary Figure 2.** Western blot images of EV preparations from healthy and PE placentas. Total protein staining was used for normalization analysis. Total protein lysate = pool of first, second and third trimester as well as preterm and PE explants.

**Supplementary Figure 3.** The effects of total, EV-depleted and EV-enriched media on the proliferation and toxicity of HUVECs was assessed. Proliferation of HUVECs (left column) was induced by incubation with media from (A) first trimester, but not altered by incubation with (C) second trimester, (E) preterm, (G) term or (I) PE placentas. Treatment of HUVECs with (B) first trimester, (D) second trimester, (F) preterm, (H) term and (J) PE media did not induce toxicity.
